# Supplementary figures and images for: HEATED ABRASIVES ON SNOW AND ICE COVERED ROADS
Source: eLife journal article supplement (doi:10.7554/elife.52623), 1982-08-01

# Figure 1- figure supplement 1

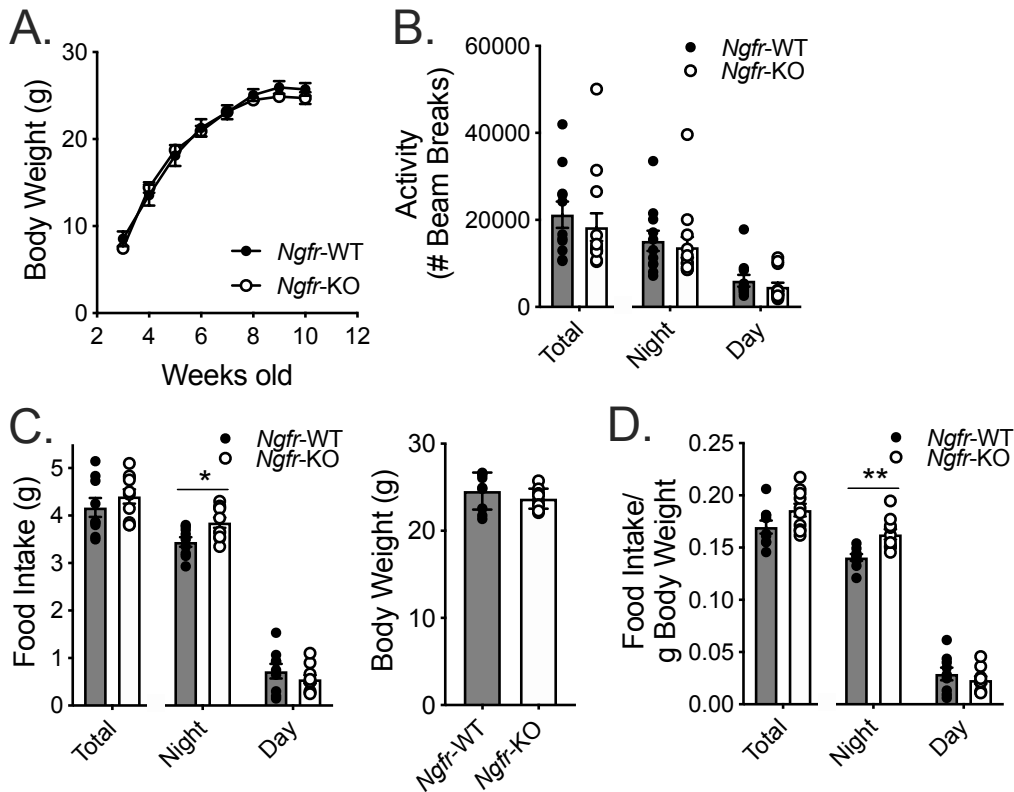

Supplement: supp [file elife_poa_e52623_Figure_1_figure_supplement_1.pdf › elife_poa_e52623_Figure_1_figure_supplement_1.pdf]

# Figure 1- figure supplement 2

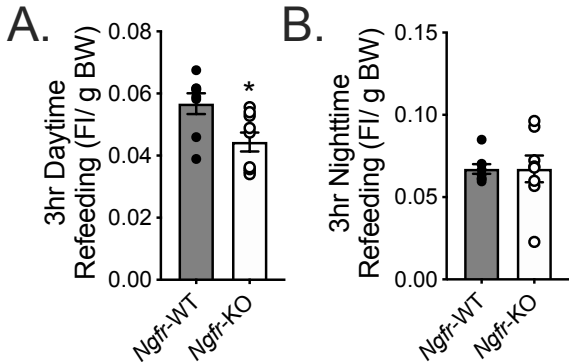

Supplement: supp [file elife_poa_e52623_Figure_1_figure_supplement_2.pdf › elife_poa_e52623_Figure_1_figure_supplement_2.pdf]

# Figure 2- figure supplement 1

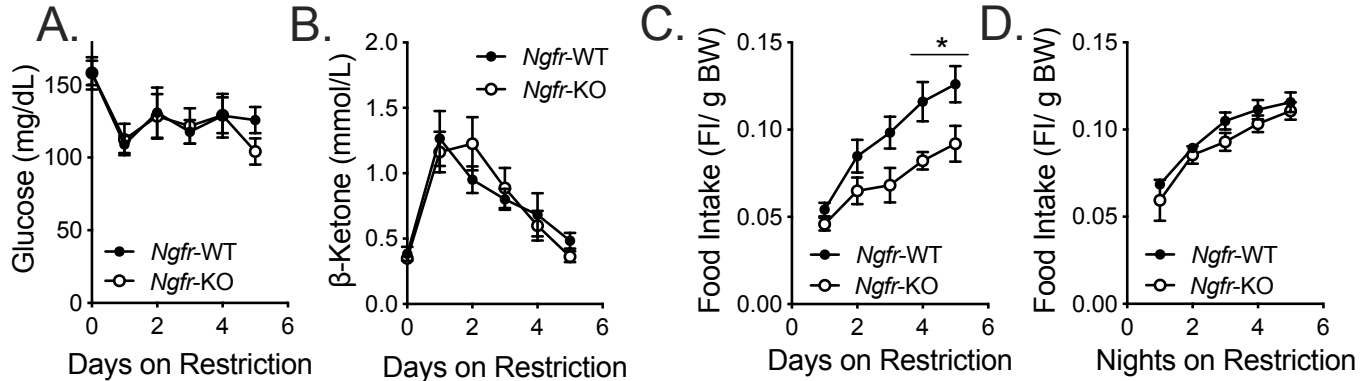

Supplement: supp [file elife_poa_e52623_Figure_2_figure_supplement_1.pdf › elife_poa_e52623_Figure_2_figure_supplement_1.pdf]

# Figure 2- figure supplement 2

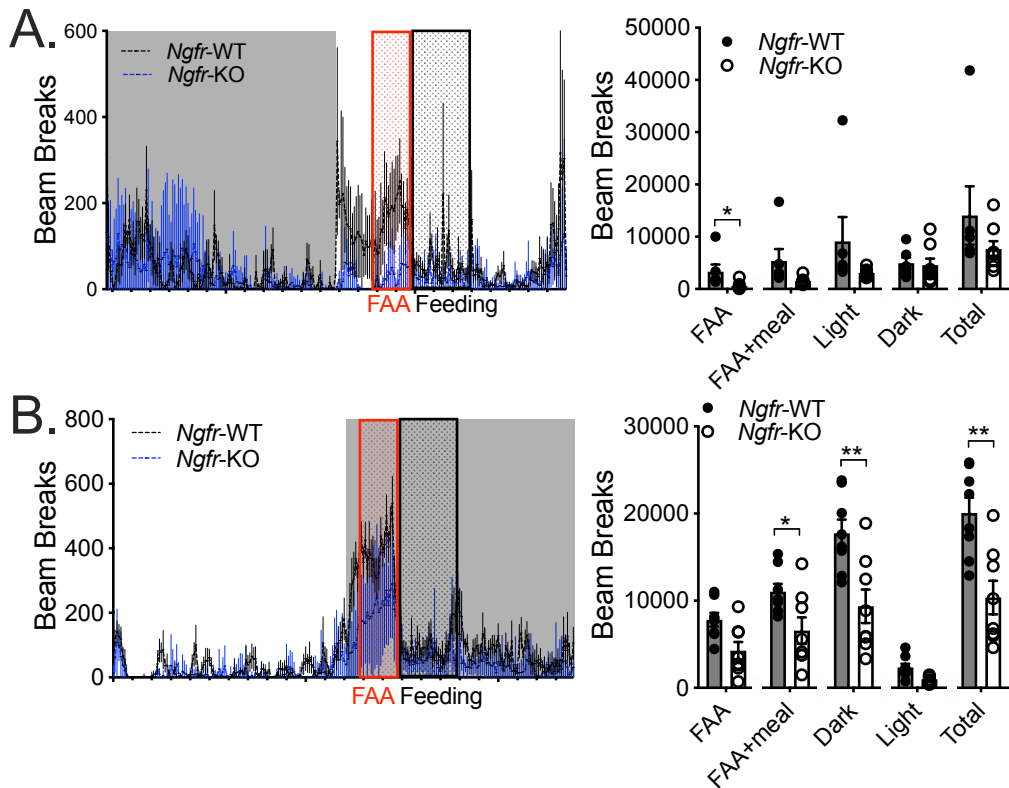

Supplement: supp [file elife_poa_e52623_Figure_2_figure_supplement_2.pdf › elife_poa_e52623_Figure_2_figure_supplement_2.pdf]

# Figure 3- figure supplement 1

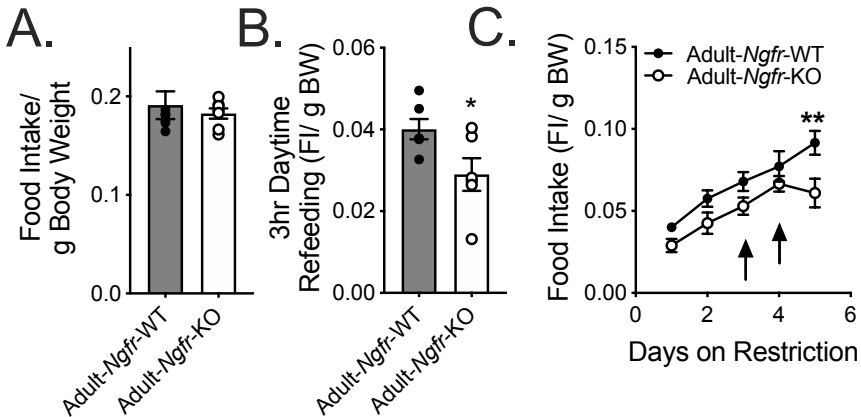

Supplement: supp [file elife_poa_e52623_Figure_3_figure_supplement_1.pdf › elife_poa_e52623_Figure_3_figure_supplement_1.pdf]

# Figure 4- figure supplement 1

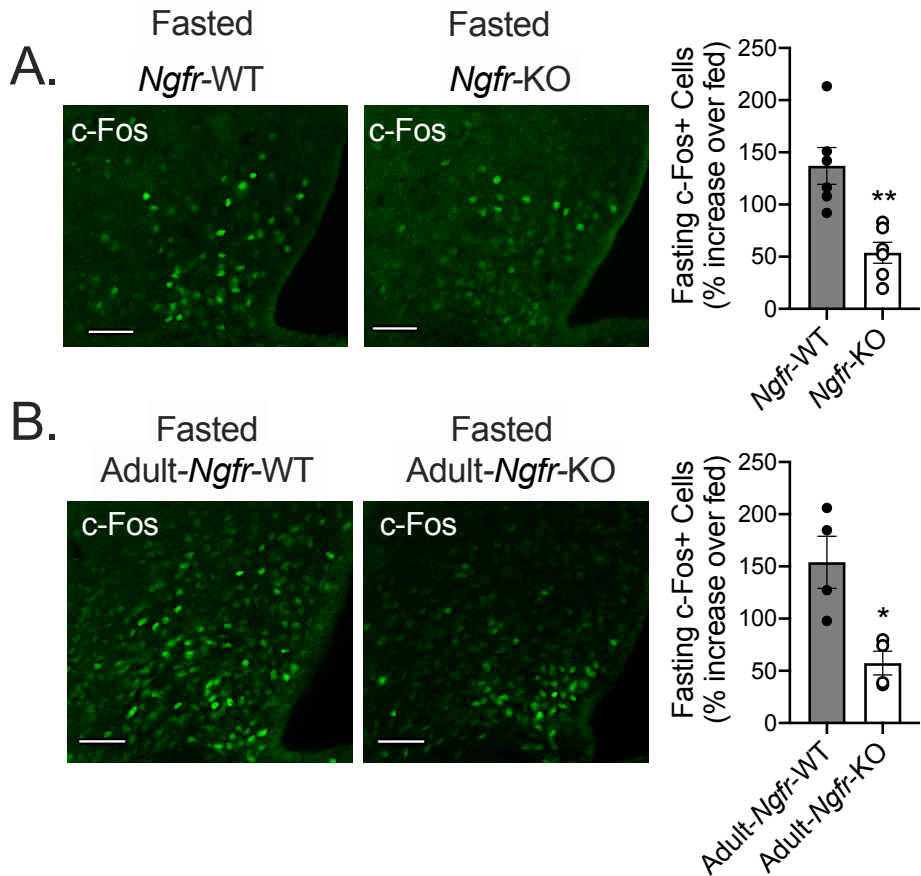

Supplement: supp [file elife_poa_e52623_Figure_4_figure_supplement_1.pdf › elife_poa_e52623_Figure_4_figure_supplement_1.pdf]

# Figure 5- figure supplement 1

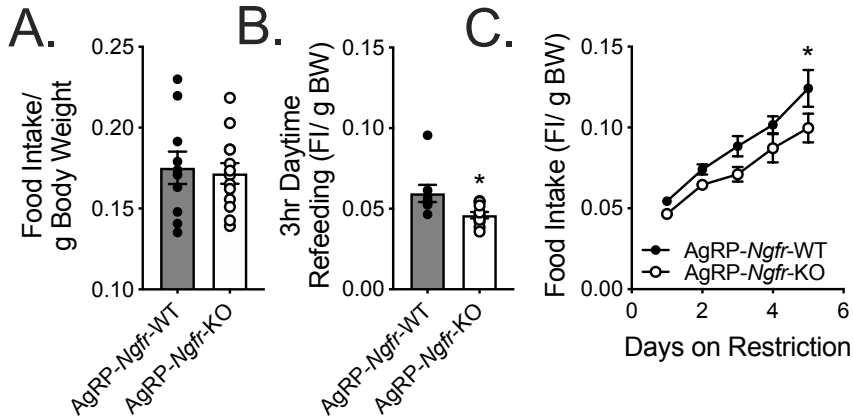

Supplement: supp [file elife_poa_e52623_Figure_5_figure_supplement_1.pdf › elife_poa_e52623_Figure_5_figure_supplement_1.pdf]

# Figure 5- figure supplement 2

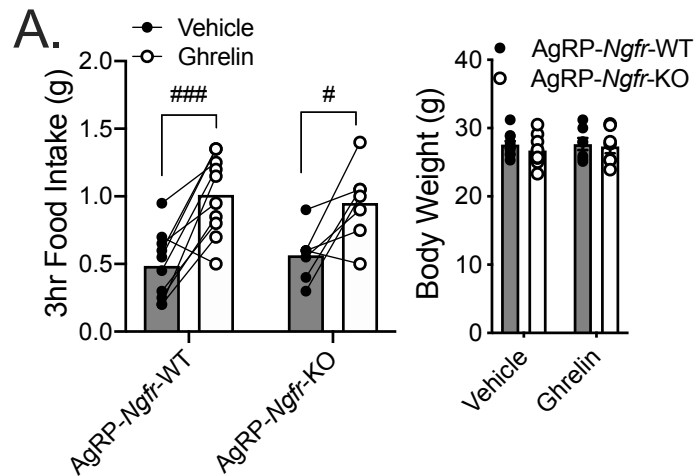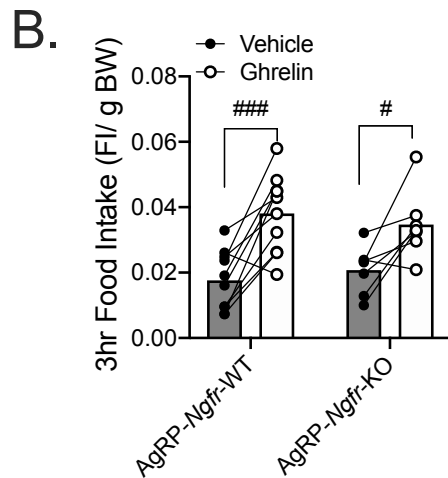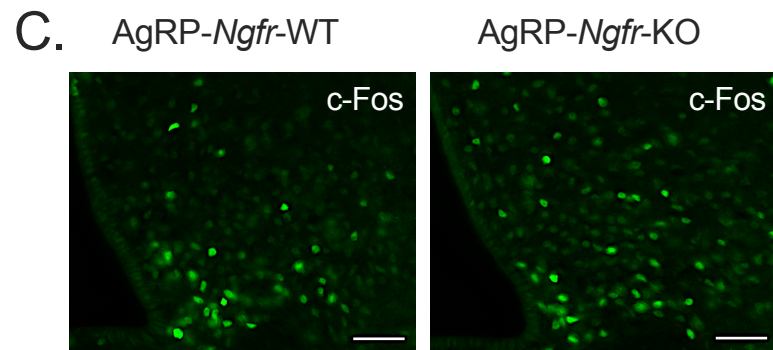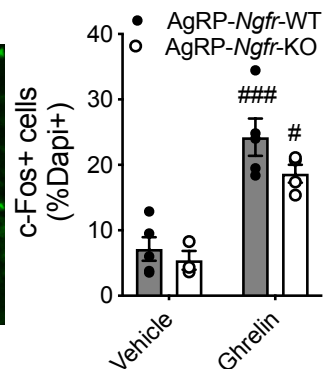

Supplement: supp [file elife_poa_e52623_Figure_5_figure_supplement_2.pdf › elife_poa_e52623_Figure_5_figure_supplement_2.pdf]

# Figure 6- figure supplement 1

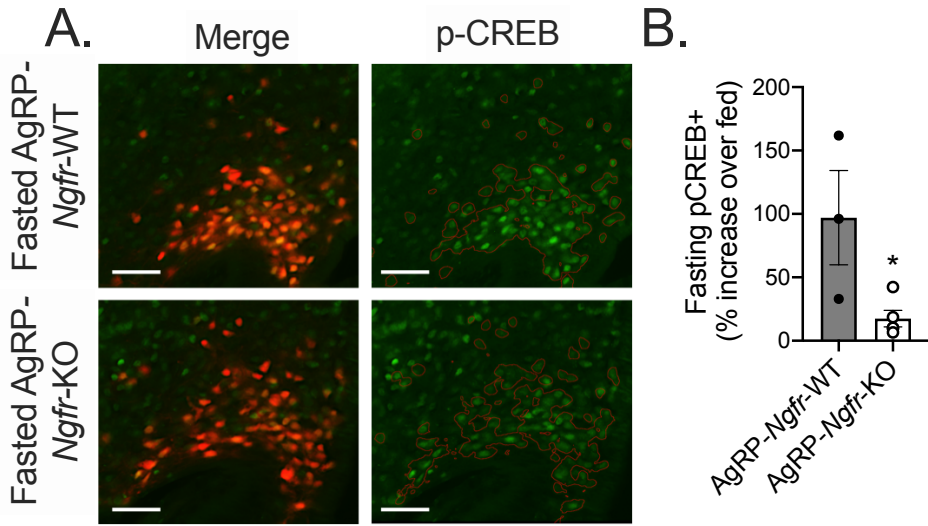

Supplement: supp [file elife_poa_e52623_Figure_6_figure_supplement_1.pdf › elife_poa_e52623_Figure_6_figure_supplement_1.pdf]
